# Supplementary material for: Influence of acid type and concentration on the synthesis of nanostructured titanium dioxide photocatalysts from titanium-bearing electric arc furnace molten slag
Source: Royal Society of Chemistry journal article supplement (doi:10.1039/c4ra13942a), 2015-01-01
Supplement: c4ra13942a1.pdf [file c4ra13942a1.pdf]

## Electronic Supplementary Information

# Influences of acid type and concentration on the synthesis of nanostructured titanium dioxide photocatalysts from titanium-bearing electric arc furnace molten slag

Li Yang, Yang Yang, Zhang Mei, Guo Min

State Key Laboratory of Advanced Metallurgy, School of Metallurgical and Ecological Engineering,  
University of Science and Technology Beijing, Beijing 100083, China.

Corresponding author: Guo Min

E-mail: [guomin@ustb.edu.cn](mailto:guomin@ustb.edu.cn); Tel: +86-010-62334926

## 1. XPS analysis

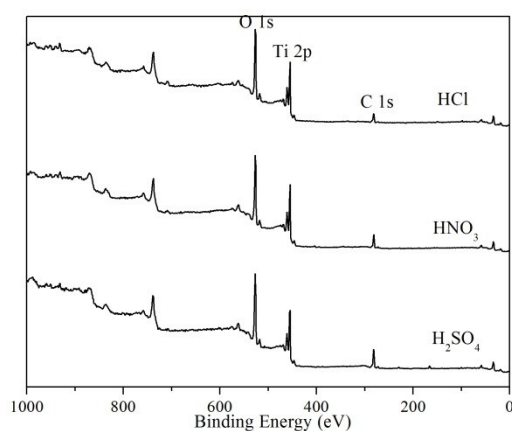

Fig. S1 The wide survey XPS spectra of the samples synthesized from different acids

## 2. The control experiments

### 2.1 The control experiment without light irradiation

The adsorption-desorption between catalyst and rhodamine B experiment without light irradiation was carried out in a quartz glass reactor equipped with a magnetic stirrer. 0.05g TiO<sub>2</sub> and 200 mL rhodamine B aqueous solution (5 mg·L<sup>-1</sup>) were placed into the reaction vessel. O<sub>2</sub> was continuously bubbled into the solution throughout the reaction. The samples of 5 ml were withdrawn from the solution and the catalyst was separated from the solution by filtration at the given intervals. The quantitative determination of rhodamine B solution was performed by measuring its absorption with a UV-Vis spectrophotometer. The absorption spectra change for rhodamine B solution as a function of time was shown in Fig. S1a.

### 2.2 The control experiment without photocatalysts

The photodegradation of rhodamine B under the visible light irradiation without catalyst was carried out in a quartz glass reactor equipped with a magnetic stirrer and a collimated light source. 200 mL rhodamine B aqueous solution (5 mg·L<sup>-1</sup>) were placed into the reaction vessel with O<sub>2</sub> was continuously bubbled into the solution. Collimated light irradiated throughout the reaction. At the given intervals of parallel light irradiation, the samples of 5 ml were withdrawn from the solution and measured its absorption with a UV-

Vis spectrophotometer. The absorption spectra change for rhodamine B solution as a function of time was shown in Fig. S1b.

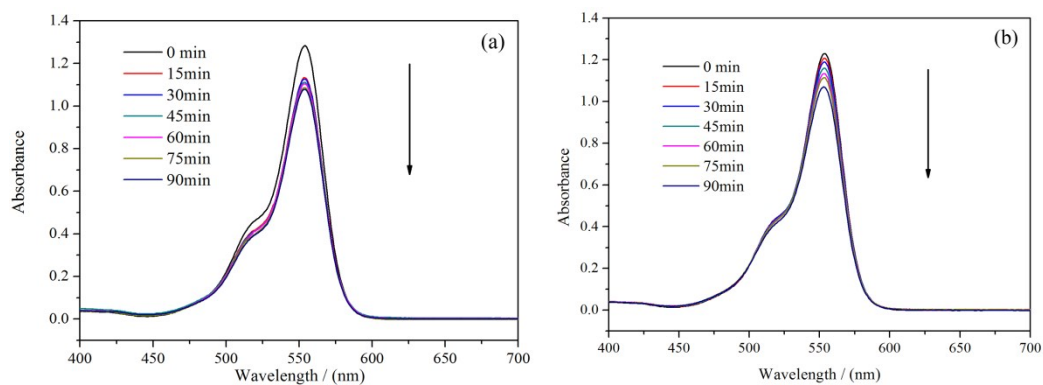

Fig. S2 The absorption spectra change for rhodamine B solution as a function of time (a) 0.05g catalyst, without light irradiation; (b) light irradiation, without catalyst
